# Supplementary material
Source: publisher site journal article supplement (https://www.dovepress.com/article/331995)

**S1. Search Strategy**

**MEDLINE:**

1. exp adult/

2. airway*.ti,ab.

3. exp chronic obstructive lung disease/

4. exp airway obstruction/

5. exp asthma/

6. asthma*.ti,ab.

7. COPD*.ti,ab.

8. exp emphysema/

9. exp Bronchitis, Chronic/

10. exp Pulmonary Disease, Chronic Obstructive/

11. exp Pulmonary Emphysema/

12. Small airway dysfunction*.ab,ti.

13. SAD.ab,ti.

14. 1 or 2 or 3 or 4 or 5 or 6 or 7 or 8 or 9 or 10 or 11 or 12 or 13

15. 1 and 14

16. MMEF.ti,ab.

17. fef25-75.mp.

18. FEF 25 - 75.mp.

19. fef50.mp.

20. MBW.ti,ab.

21. breath washout.ti,ab.

22. impulse oscill*.ti,ab.

23. forced oscill*.ti,ab.

24. ios.ti,ab.

25. fot.ti,ab.

26. 16 or 17 or 18 or 19 or 20 or 21 or 22 or 23 or 24 or 25

27. exp Bronchodilator Agents/

28. exp Albuterol/

29. salbutamol.mp.

30. 27 or 28 or 29

31. exp Forced Expiratory Volume/

32. exp Respiratory Function Tests/

33. FEV1.ti,ab.

34. spirome*.ti,ab.

35. exp Forced Vital Capacity/

36. FVC.ti,ab.

37. 31 or 32 or 33 or 34 or 35 or 36

38. change*.ti,ab.

39. reversibility.ti,ab.

40. BDT.ti,ab.

41. BDR.ti,ab.

42. AR.ti,ab.

43. bronchodilator test.ti,ab.

44. respons*.ti,ab.

45. 38 or 39 or 40 or 41 or 42 or 43 or 44

46. 15 and 26 and 30 and 37 and 45

**Embase:**

1. exp adult/

2. airway*.ti,ab.

3. exp chronic obstructive lung disease/

4. exp airway obstruction/

5. exp small airway disease/

6. exp asthma/

7. asthma*.ti,ab.

8. COPD*.ti,ab.

9. exp emphysema/

10. exp chronic bronchitis/

11. Small airway dysfunction*.ab,ti.

12. SAD.ab,ti.

13. 2 or 3 or 4 or 5 or 6 or 7 or 8 or 9 or 10 or 11 or 12

14. 1 and 13

15. exp maximal mid expiratory flow/

16. MMEF.ti,ab.

17. FEF 25 - 75.ti,ab.

18. FEF25-75.ti,ab.

19. FEF50.ti,ab.

20. exp forced expiratory flow/

21. exp lung clearance/

22. MBW.ti,ab.

23. breath washout.ti,ab.

24. impulse oscill*.ti,ab.

25. forced oscill*.ti,ab.

26. ios.ti,ab.

27. fot.ti,ab.

28. 15 or 16 or 17 or 18 or 19 or 20 or 21 or 22 or 23 or 24 or 25 or 26 or 27

29. exp salbutamol/

30. exp beta 2 adrenergic receptor stimulating agent/

31. exp bronchodilating agent/

32. 29 or 30 or 31

33. exp forced expiratory volume/

34. exp lung function/

35. FEV1.ti,ab.

36. Spirometry.ti,ab.

37. FVC.ti,ab.

38. exp Forced Vital Capacity/

39. 33 or 34 or 35 or 36 or 37 or 38

40. change*.ti,ab.

41. reversibility.ti,ab.

42. BDT.ti,ab.

43. AR.ti,ab.

44. bronchodilator test.ti,ab.

45. BDR.ti,ab.

46. respons*.ti,ab.

47. 40 or 41 or 42 or 43 or 44 or 45 or 46

48. 14 and 28 and 32 and 39 and 47

**S2. Quality Assessment Graph**


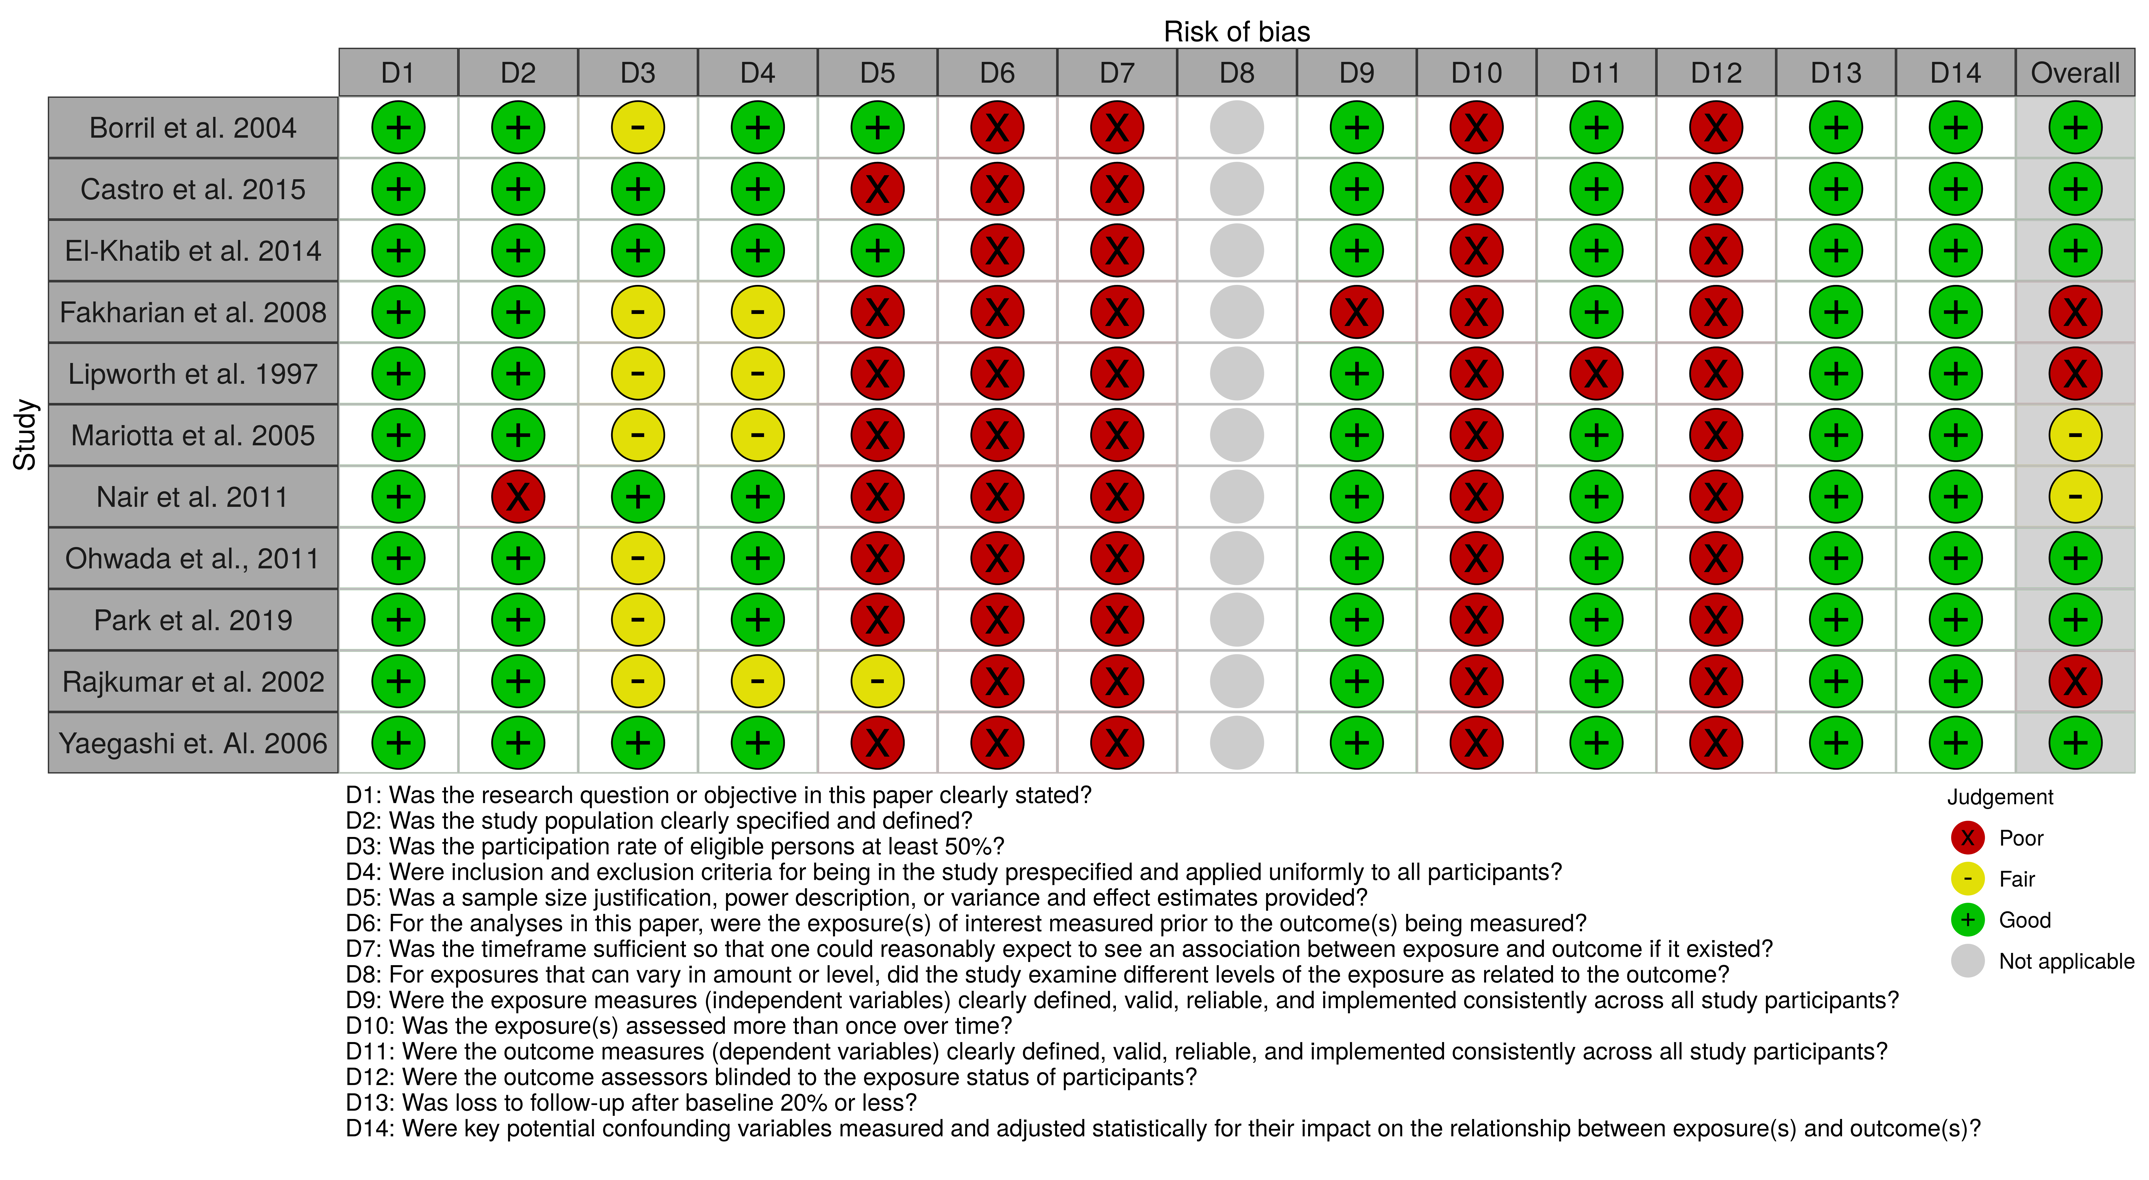

Supplement: Supplementary file 1 [file get_supplementary_file.php]
